# Supplementary material for: Meeting radiation dosimetry capacity requirements of population-scale exposures by geostatistical sampling
Source: PLoS One. 2020 Apr 24;15(4):e0232008. doi: 10.1371/journal.pone.0232008 (PMC7182271; doi:10.1371/journal.pone.0232008)
Supplement: S1 Table — (XLSX) [file pone.0232008.s004.xlsx]

## Sheet: Table-SDC1A
S1A Table: Comparison between Derived and HPAC plumes in terms of area and population (Bray-Curtis dissimilarity [BCD]; Root-mean-square deviation [RMSD]; Accuracy >2Gy by area and population)
	Replicate:					2					3					4					5
	# Initial Random Samples*	# Exposed Random Samples (>0 Gy)*	# Unexposed Random Samples (=0 Gy)*	BCD	RMSD	Accuracy	# Exposed Random Samples (>0 Gy)*	# Unexposed Random Samples (=0 Gy)*	BCD	RMSD	Accuracy	# Exposed Random Samples (>0 Gy)*	# Unexposed Random Samples (=0 Gy)*	BCD	RMSD	Accuracy	# Exposed Random Samples (>0 Gy)*	# Unexposed Random Samples (=0 Gy)*	BCD	RMSD	Accuracy	# Exposed Random Samples (>0 Gy)*	# Unexposed Random Samples (=0 Gy)*	BCD	RMSD	Accuracy
Albany NY	252``	12	240	0.264	0.473	0.75	12	240	0.267	0.483	0.784	12	240	0.281	0.493	0.761
Alexandria VA	1620	39	1581	0.439	0.688	0.578	41	1579	0.354	0.586	0.56	39	1581	0.424	0.665	0.528
Baltimore MD	848	18	830	0.392	0.66	0.75	18	830	0.365	0.437	0.759	19	829	0.382	0.645	0.762
Boston MA	3353~	24	12534	0.321	0.561	0.677	30	12528	0.308	0.534	0.592	32	12526	0.281	0.493	0.634
Birmingham AL	683	11	672	0.389	0.667	0.678	10	673	0.486	0.737	0.696	10	673	0.455	0.715	0.719
Buffalo NY	333	4	329	0.276	0.477	0.668	3	330	0.258	0.448	0.646	3	330	0.258	0.445	0.625
Burlington NY	125	5	120	0.279	0.493	0.902	6	119	0.262	0.469	0.903	5	120	0.306	0.55	0.907
Camden NJ	382	21	361	0.427	0.667	0.711	21	361	0.391	0.631	0.708	21	361	0.439	0.69	0.716
Charleston SC	356	8	348	0.518	0.762	0.605	8	348	0.509	0.757	0.585	8	348	0.489	0.75	0.707
Charlotte NC	1087	17	1070	0.455	0.694	0.675	10	1077	0.498	0.746	0.609	10	1077	0.492	0.745	0.656
Chicago IL	2705	23	2682	0.517	0.768	0.787	16	2689	0.503	0.759	0.707	25	2680	0.499	0.759	0.782
Cincinnati OH	395	2	393	0.444	0.69	0.732	2	393	0.427	0.665	0.725	9	386	0.413	0.663	0.696
Cleveland OH	468	12	456	0.4	0.65	0.72	16	452	0.38	0.63	0.732	12	456	0.368	0.612	0.722
Columbia SC	414	13	401	0.59	0.821	0.66	13	401	0.694	0.884	0.301	16	398	0.587	0.816	0.605	12	402	0.645	0.852	0.556	12	402	0.593	0.828	0.276
Columbus OH	887~	7	880	0.499	0.75	0.665	6	881	0.486	0.751	0.441	9	878	0.463	0.731	0.747	8	879	0.473	0.734	0.679	9	878	0.454	0.709	0.665
Des Moines IA	311^	9	302	0.243	0.422	0.747	8	303	0.27	0.461	0.702	5	306	0.278	0.472	0.77
Detroit MI	728	11	717	0.352	0.604	0.803	10	718	0.403	0.658	0.762	10	718	0.367	0.62	0.792
Evansville IN	239	12	227	0.515	0.75	0.678	12	227	0.466	0.7	0.634	8	231	0.548	0.785	0.706
Grand Rapids MI	404~	15	389	0.416	0.681	0.729	16	388	0.408	0.672	0.745	15	389	0.404	0.669	0.737
New York NY (Rural)	267	9	258	0.498	0.738	0.688	7	260	0.466	0.714	0.69	8	259	0.45	0.692	0.649
New York NY (Urban)	1643~	72	1571	0.247	0.446	0.803	73	1570	0.242	0.435	0.814	77	1566	0.237	0.426	0.81	74	1569	0.347	0.572	0.808
Philadelphia PA	1751	22	1729	0.452	0.728	0.792	22	1729	0.495	0.795	0.755	22	1729	0.47	0.734	0.749
Washington D.C. (Rural)	1137	16	1121	0.287	0.498	0.747	17	1120	0.353	0.594	0.736	18	1119	0.431	0.695	0.731
Washington D.C. (Urban)	1442	54	1388	0.26	0.451	0.682	54	1388	0.354	0.595	0.669	51	1391	0.292	0.497	0.669
New York NY (Urban; Rain)	1620~	62	1558	0.256	0.456	0.723
New York NY (Urban; Snow)	1620~	63	1557	0.243	0.442	0.743
Washington D.C. (Urban, Rain)	1442	54	1388	0.26	0.451	0.682
Washington D.C. (Urban, Snow)	1442	42	1400	0.301	0.546	0.82
Albany NY (Wrong wind direction, '0.05:0.2%' distribution)	4309	5	4304	0.239	0.43	0.742
Albany NY (Wrong wind direction, '0.01:1.0%' distribution)	16839	3	16836	0.236	0.423	0.745
* Numbers based on initial random sampling of 0.1% of the population of each sub-division overlapping and surrounding the HPAC plume. The number of exposed and unexposed random samples should equal the total number of initial random samples.
`` Random points for the Albany NY scenario were generated for the sub-divisions Albany and Colonie only
~ Population numbers inflated due to ArcMap placing data points equalling 0.1% population of sub-division to multiple surrounding islands, or any other secondary sub-division with the same name. These issue were corrected in all scenarios in which it occurred (see Methods regarding sub-division names)
^ 0 Gy locations north of Latitude '41.636293' were removed from initial sampling. The simulation generated an excessive number of samples, beyond the limitations for successful processing by ArcMap.
